# Supplementary material
Source: Springer Nature journal article supplement (https://www.springermedizin.de/resource/supplementary/12986_2014_592_MOESM1_ESM.pdf/25655092)

# Intestinal Injury Score

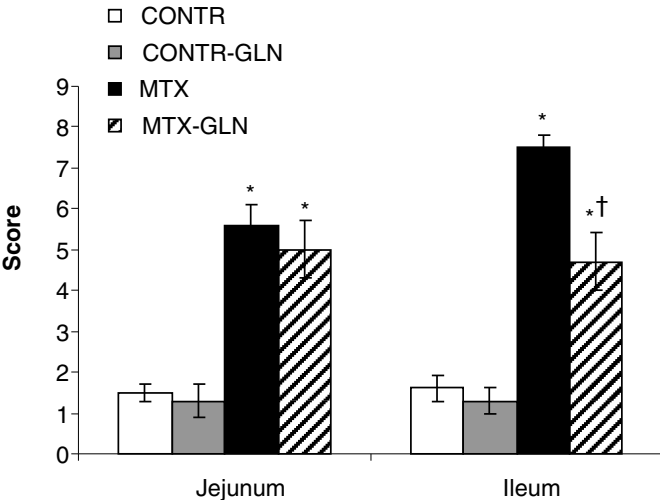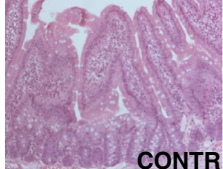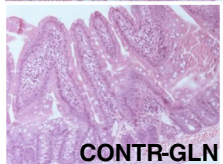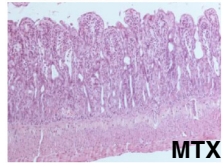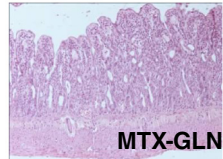

Supplement: MOESM1 [file 25655092]
